# Supplementary material for: Microbiota Depletion Promotes Human Rotavirus Replication in an Adult Mouse Model
Source: MDPI journal article supplement (doi:10.3390/biomedicines9070846), 2021-07-20
Supplement: s1 [file s1]

## Article

# Microbiota Depletion Promotes Human Rotavirus Replication in an Adult Mouse Model

Roberto Gozalbo-Rovira <sup>1,†</sup>, Cristina Santiso-Bellón <sup>1,†</sup>, Javier Buesa <sup>1,2</sup>, Antonio Rubio-del-Campo <sup>3</sup>, Susana Vila-Vicent <sup>1</sup>, Carlos Muñoz <sup>1</sup>, María J Yebra <sup>3</sup>, Vicente Monedero <sup>3,\*</sup> and Jesús Rodríguez-Díaz <sup>1,2,\*</sup>

<sup>1</sup> Department of Microbiology, School of Medicine, University of Valencia, Av. Blasco Ibáñez 17, 46010 Valencia, Spain; rovigoro@uv.es (R.G.-R.); cristina.santiso@uv.es (C.S.-B.); javier.buesa@uv.es (J.B.); susana.vila@uv.es (S.V.-V.); carlos.munoz@uv.es (C.M.)

<sup>2</sup> Hospital Clínico Universitario de Valencia, Instituto de Investigación INCLIVA, Valencia, Spain

<sup>3</sup> Department of Biotechnology, IATA-CSIC, Av. Agustín Escardino 7, 46980 Paterna, Valencia, Spain; anrucam@iata.csic.es (A.R.d.C.); yebra@iata.csic.es (M.J.Y.)

\* Correspondence: btcmon@iata.csic.es (V.M.); jesus.rodriguez@uv.es (J.R.-D.); Tel.: +34-96-3983316 (V.M.); +34-96-3900022 (ext. 2006) (J.R.-D.)

† These two authors contributed equally.

**Table S1.** primers used for qPCR in the present study.

| Target         | Gene Bank Access number | Primer name      | Sequence                        | Nucleotide positions | Reference |
|----------------|-------------------------|------------------|---------------------------------|----------------------|-----------|
| IL1 $\beta$    | NM_008361               | IL-1 $\beta$ -F  | 5'-TCGCTCAGGGTCACAAGAAA-3'      | 995-1014             | [1]       |
|                |                         | IL-1 $\beta$ -R  | 5'-CATCAGAGGCAAGGAGGAAAAC-3'    | 1067-1046            |           |
| IL4            | NM_021283.2             | IL-4-F           | 5'-GGTCTCAACCCCCAGCTAGT-3'      | 63-82                | [2]       |
|                |                         | IL-4-R           | 5'-GCCGATGATCTCTCTCAAGTGAT-3'   | 164-142              |           |
| IL6            | NM_031168               | IL-6-F           | 5'-CTGCAAGAGACTTCCATCCAGTT-3'   | 92-114               | [1]       |
|                |                         | IL-6-R           | 5'-GAAGTAGGGAAGGCCGTGG-3'       | 161-143              |           |
|                |                         | IL-8-F           | 5'-CAGGCCACAGACGGACATG-3'       | 22-40                |           |
| CXCL15         | NM_011339               | IL-8-R           | 5'-GGACGAAGATGCCTAGGTTAAGG-3'   | 98-76                | [1]       |
| IL10           | NM_010548               | IL-10-F          | 5'-GCTCTTACTGACTGGCATGAG-3'     | 97-117               | [1]       |
|                |                         | IL-10-R          | 5'-CGCAGCTCTAGGAGCATGTG-3'      | 201-182              |           |
| IL12 (IL12p40) | AH004859.1              | IL-12-F          | 5'-AGCACCAGCTTCTTCATCAGG-3'     | 720-740              | [3]       |
|                |                         | IL-12-R          | 5'-CCTTCTGGTTACACCCCTCC-3'      | 931-911              |           |
| IL13           | NM_008355.3             | IL-13-F          | 5'-CCTGGCTCTTGCTTGCCTT-3'       | 92-110               | [2]       |
|                |                         | IL-13-R          | 5'-GGTCTTGTGTGATGTTGCTCA-3'     | 207-187              |           |
| TNF $\alpha$   | NM_013693               | TNF- $\alpha$ -F | 5'-CCACCACGCTCTTCTGTCTAC-3'     | 298-318              | [1]       |
|                |                         | TNF- $\alpha$ -R | 5'-TGGGCTACAGGCTTGTCAC-3'       | 448-429              |           |
| INF $\gamma$   | NM_008337.4             | INF- $\gamma$ -F | 5'-CATTTCATGAGTATTGCCAAGTTTG-3' | 444-467              | [4]       |
|                |                         | INF- $\gamma$ -R | 5'-GCTGGATTCCGGCAACAG-3'        | 547-530              |           |
| TLR2           | NM_011905.3             | TLR2-F           | 5'-GTCTCTGCGACCTAGAAGTGGA-3'    | 162-183              | [5]       |
|                |                         | TLR2-R           | 5'-CGGAGGGAATAGAGGTGAAAG A-3'   | 497-476              |           |
| GAPDH          | NM_001289726            | GAPDH-F          | 5'-AGCTTGTTCATCAACGGGAAG-3'     | 283-302              | [1]       |
|                |                         | GAPDH-R          | 5'-TTTGATGTTAGTGGGGTCTCG-3'     | 344-324              |           |
| RPLP0          | NM_007475.5             | RPLP0-F          | 5'-AGATTCGGGATATGCTGTTGGC-3'    | 411-432              | In house  |

## References.

1. Leclercq S, Mian FM, Stanisz AM, Bindels LB, Cambier E, Ben-Amram H, et al. Low-dose penicillin in early life induces long-term changes in murine gut microbiota, brain cytokines and behavior. *Nat Commun.* 2017;8: 15062. doi:10.1038/ncomms15062

2. Spandidos A, Wang X, Wang H, Seed B. PrimerBank: a resource of human and mouse PCR primer pairs for gene expression detection and quantification. *Nucleic Acids Res.* 2010;38: D792-9. doi:10.1093/nar/gkp1005
3. Cardona P-J, Gordillo S, Diaz J, Tapia G, Amat I, Pallares A, et al. Widespread Bronchogenic Dissemination Makes DBA/2 Mice More Susceptible than C57BL/6 Mice to Experimental Aerosol Infection with *Mycobacterium tuberculosis*. *Infect Immun.* 2003;71: 5845–5854. doi:10.1128/IAI.71.10.5845-5854.2003
4. Keilbaugh SA, Shin ME, Banchereau RF, McVay LD, Boyko N, Artis D, et al. Activation of RegIII $\beta$ /gamma and interferon gamma expression in the intestinal tract of SCID mice: an innate response to bacterial colonisation of the gut. *Gut.* 2005;54: 623–9. doi:10.1136/gut.2004.056028
5. An H, Yu Y, Zhang M, Xu H, Qi R, Yan X, et al. Involvement of ERK, p38 and NF-kappaB signal transduction in regulation of TLR2, TLR4 and TLR9 gene expression induced by lipopolysaccharide in mouse dendritic cells. *Immunology.* 2002;106: 38–45. doi:10.1046/j.1365-2567.2002.01401.x
